# Supplementary material for: Variability in Stomatal Adaptation to Drought among Grapevine Cultivars: Genotype-Dependent Responses
Source: MDPI journal article supplement (doi:10.3390/agriculture13122186), 2023-11-22
Supplement: s1 [file s1]

## SUPPLEMENTARY MATERIAL

### Variability in stomatal adaptation to drought among grapevine cultivars: genotype-dependent responses

**Table S1.** List of the oligonucleotides used in the study.

| Name                  | Primer sequence (5'-3') | Gene annotation or Target | Gene ID           | Reference                                        |
|-----------------------|-------------------------|---------------------------|-------------------|--------------------------------------------------|
| <i>VvACT1_F</i>       | GCCCCTCGTCTGTGACAATG    | Actin                     | VIT_04s0044g00580 | Chitarra et al., 2018                            |
| <i>VvACT1_R</i>       | CCTTGGCCGACCCACAATA     |                           |                   |                                                  |
| <i>VvUBI_F</i>        | TCTGAGGTTCGTGGTGGA      | Ubiquitin                 | VIT_16s0098g00580 | Chitarra et al., 2018                            |
| <i>VvUBI_R</i>        | AGGCGTGCATAACATTTGCG    |                           |                   |                                                  |
| <i>VvEPFL9-like_F</i> | TCTCCTTGCAGCTCTCCTCA    | EPFL9                     | VIT_05s0062g01380 | This study                                       |
| <i>VvEPFL9-like_R</i> | ACCCCATTTTCTCCATCCTCCA  |                           |                   |                                                  |
| <i>VvEPF1-like_F</i>  | AGCAGGGGACGATGGTGAGG    | EPF1                      | VIT_12s0059g01730 | This study                                       |
| <i>VvEPF1-like_R</i>  | GGCAAGCTTGACCCTGCAACT   |                           |                   |                                                  |
| <i>VvEPF2-like_F</i>  | TTGCGGGCCGTGCTTTCCAT    | EPF2                      | VIT_18s0164g00010 | This study                                       |
| <i>VvEPF2-like_R</i>  | TCCCTTTACACGTGCACCTGT   |                           |                   |                                                  |
| <i>VvDH_F</i>         | AACCCGGCGTGCTTCAT       | DHN1a                     | VIT_04s0023g02480 | Chitarra et al., 2014<br>Pagliarani et al., 2022 |
| <i>VvDH_R</i>         | CATGCCCCGTATCCTCTCTTT   |                           |                   |                                                  |

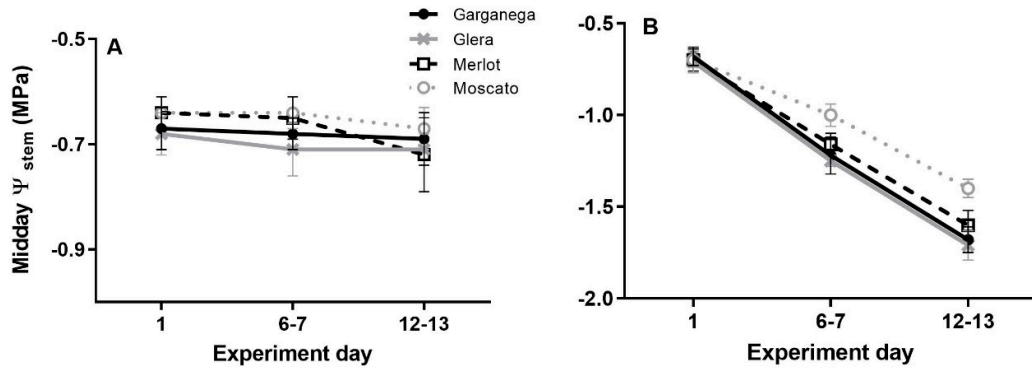

**Figure S1.** Midday stem water potential ( $\Psi_{\text{stem}}$ ) measured in well-watered (A) and water stress treatments (B) of the four varieties under study during the experiment. Each point is the average of measurements taken on five individual plants over 2 seasons (2017-2018). This figure summarises the data published in extended form in Gaiotti et al. (2023), [28].

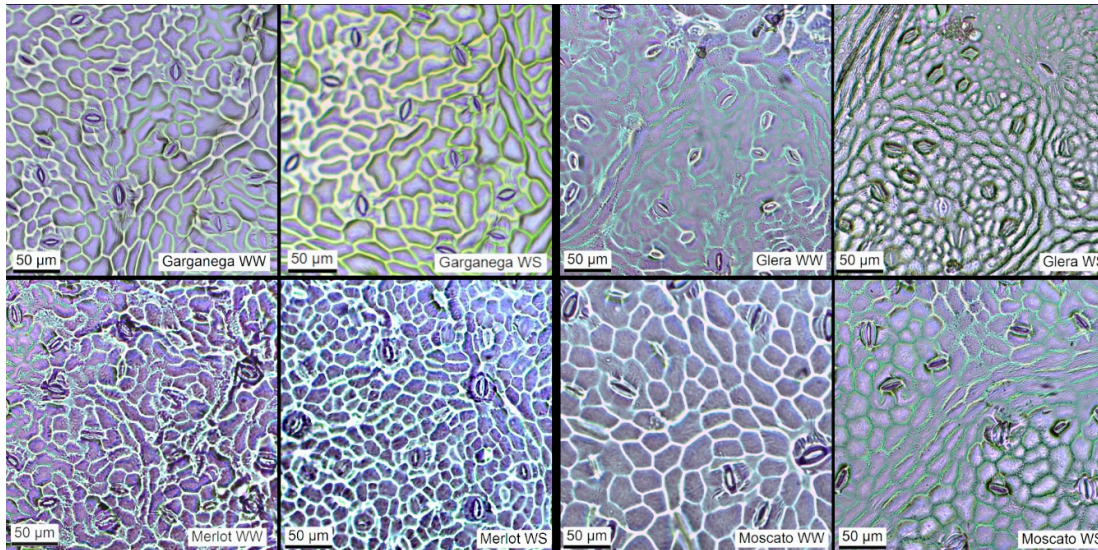

**Figure S2.** Comparative images of the stomata of the four varieties under study under well-watered (WW) and water stress (WS) conditions. Photomicrographies are taken from nail polish impressions of the abaxial leaf surface of young leaves (7 days after tip separations).
